# Supplementary material for: On willingness to pay and impact mechanism of green agricultural products: a case of shrimp rice in Hunan, China
Source: Frontiers journal article supplement (doi:10.3389/fsufs.2024.1465425), 2024-12-18
Supplement: Table_1.DOCX [file Table_1.DOCX]

# Appendix

**Table 1**

Regression estimation results of model 1

| Variables | Model 1 | | | | | |
| --- | --- | --- | --- | --- | --- | --- |
| OLS | | WTP | | Premium | |
| Coefficient  Std. Err. | t value | Coefficient  Std. Err. | z value | Coefficient  Std. Err. | t value |
| Familiarity | 0.304*** | 7.07 | 0.407*** | 7.14 | 1.617*** | 9.78 |
|  | 0.043 |  | 0.057 |  | 0.165 |  |
| Gender | 0.122* | 1.96 | 0.049 | 0.61 | 0.287*** | 4.50 |
|  | 0.062 |  | 0.081 |  | 0.064 |  |
| Education | 0.014 | 0.54 | 0.071** | 2.04 | 0.220*** | 6.12 |
|  | 0.026 |  | 0.035 |  | 0.036 |  |
| Age | 0.086** | 2.32 | 0.045 | 0.68 | 0.366*** | 7.39 |
|  | 0.037 |  | 0.067 |  | 0.050 |  |
| Children | 0.115* | 1.78 | 0.170* | 1.95 | 0.755*** | 7.53 |
|  | 0.065 |  | 0.087 |  | 0.100 |  |
| Elder | 0.126** | 1.97 | 0.135 | 1.61 | 0.568*** | 6.90 |
|  | 0.064 |  | 0.084 |  | 0.082 |  |
| Income | 0.194*** | 8.42 | 0.135*** | 4.34 | 0.616*** | 10.98 |
|  | 0.023 |  | 0.031 |  | 0.056 |  |
| Household size | -0.042 | -1.47 | -0.077** | -2.06 | -0.300*** | 7.16 |
|  | 0.028 |  | 0.037 |  | 0.042 |  |
| Frequency | 0.284*** | 6.27 | 0.190*** | 3.11 | 0.815*** | 10.42 |
|  | 0.045 |  | 0.061 |  | 0.078 |  |
| Marriage |  |  | 0.119 | 0.95 |  |  |
|  |  |  | 0.125 |  |  |  |
| IMR_1 |  |  |  |  | 5.211*** | 8.21 |
|  |  |  |  |  | 0.635 |  |
| Cons | -0.168 | -0.80 | -1.829*** | 6.33 | -10.269*** | 8.23 |
|  | 0.209 |  | 0.289 |  | 1.247 |  |
| *N* | 1158 | | | | |  |
| *R*2 | 0.201 |  |  |  | 0.246 |  |

Note: *** implies the significant result is on the level of 1%, ** implies the significant result is on the level of 5%, and * implies the significant result is on the level of 10%.

**Table 2**

Regression estimation results of model 2

| Variables | Model 2 | | | | | |
| --- | --- | --- | --- | --- | --- | --- |
| OLS | | WTP | | Premium | |
| Coefficient  Std. Err. | t value | Coefficient  Std. Err. | z value | Coefficient  Std. Err. | t value |
| Familiarity | 0.295*** | 6.89 | 0.400*** |  | 1.659*** |  |
|  | 0.043 |  | 0.057 |  | 0.162 |  |
| Gender | 0.114* | 1.84 | 0.064 |  | 0.350*** |  |
|  | 0.062 |  | 0.082 |  | 0.066 |  |
| Education | -0.006 | -0.24 | 0.045 |  | 0.121*** |  |
|  | 0.027 |  | 0.036 |  | 0.030 |  |
| Age | 0.069* | 1.85 | 0.029 |  | 0.280*** |  |
|  | 0.037 |  | 0.067 |  | 0.043 |  |
| Children | 0.101 | 1.56 | 0.162* |  | 0.737*** |  |
|  | 0.064 |  | 0.088 |  | 0.096 |  |
| Elder | 0.129** | 2.02 | 0.154* |  | 0.668*** |  |
|  | 0.064 |  | 0.085 |  | 0.087 |  |
| Income | 0.183*** | 7.93 | 0.117*** |  | 0.567*** |  |
|  | 0.023 |  | 0.031 |  | 0.049 |  |
| Household size | -0.042 | -1.48 | -0.072* |  | -0.294*** |  |
|  | 0.028 |  | 0.038 |  | 0.040 |  |
| Frequency | 0.282*** | 6.20 | 0.191*** |  | 0.843*** |  |
|  | 0.045 |  | 0.062 |  | 0.078 |  |
| Marriage |  |  | 0.097 |  |  |  |
|  |  |  | 0.127 |  |  |  |
| Packaging | 0.013 | 0.13 | -0.144 |  | -0.510*** |  |
|  | 0.098 |  | 0.132 |  | 0.113 |  |
| Price | -0.559*** | -4.11 | -0.590*** |  | -2.544*** |  |
|  | 0.136 |  | 0.186 |  | 0.263 |  |
| Brand | -0.240* | -1.93 | -0.157 |  | -0.636*** |  |
|  | 0.125 |  | 0.171 |  | 0.129 |  |
| Date | -0.495*** | -3.30 | -0.341* |  | -1.507*** |  |
|  | 0.150 |  | 0.203 |  | 0.186 |  |
| Flavor | -0.451*** | -3.66 | -0.255 |  | -1.144*** |  |
|  | 0.123 |  | 0.169 |  | 0.143 |  |
| Supermarket | 0.034 | 0.52 | 0.201** |  | 0.806*** |  |
|  | 0.065 |  | 0.087 |  | 0.109 |  |
| Online | 0.076 | 0.46 | 0.292 |  | 1.178*** |  |
|  | 0.166 |  | 0.222 |  | 0.205 |  |
| IMR_2 |  |  |  |  | 5.521*** |  |
|  |  |  |  |  | 0.633 |  |
| Cons | 0.373 | 1.48 | -1.496*** |  | -9.357*** |  |
|  | 0.251 |  | 0.347 |  | 1.141 |  |
| *N* | 1158 |  | 1158 |  | 1158 |  |
| *R*2 | 0.220 |  |  |  | 0.269 |  |

Note: *** implies the significant result is on the level of 1%, ** implies the significant result is on the level of 5%, and * implies the significant result is on the level of 10%.

**Table 3**

Regression estimation results of model 3

| Variables | Model 3 | | | | | |
| --- | --- | --- | --- | --- | --- | --- |
| OLS | | WTP | | Premium | |
| Coefficient  Std. Err. | t value | Coefficient  Std. Err. | z value | Coefficient  Std. Err. | t value |
| Familiarity | 0.153*** | 3.54 | 0.177*** | 2.74 | 0.326*** | 6.82 |
|  | 0.043 |  | 0.065 |  | 0.048 |  |
| Gender | 0.182*** | 3.06 | 0.172* | 1.92 | 0.370*** | 5.86 |
|  | 0.060 |  | 0.090 |  | 0.063 |  |
| Education | 0.026 | 1.01 | 0.132*** | 3.34 | 0.168*** | 5.38 |
|  | 0.026 |  | 0.040 |  | 0.031 |  |
| Age | 0.072** | 2.05 | 0.043 | 0.59 | 0.147*** | 4.11 |
|  | 0.035 |  | 0.073 |  | 0.036 |  |
| Children | 0.069 | 1.13 | 0.156* | 1.66 | 0.264*** | 4.07 |
|  | 0.061 |  | 0.094 |  | 0.065 |  |
| Elder | 0.122** | 2.02 | 0.167* | 1.85 | 0.313*** | 4.90 |
|  | 0.060 |  | 0.091 |  | 0.064 |  |
| Income | 0.157*** | 7.16 | 0.107*** | 3.14 | 0.268*** | 10.35 |
|  | 0.022 |  | 0.034 |  | 0.026 |  |
| Household size | -0.039 | -1.44 | -0.065 | -1.60 | -0.121*** | 4.25 |
|  | 0.027 |  | 0.040 |  | 0.028 |  |
| Frequency | 0.250*** | 5.81 | 0.169** | 2.54 | 0.398*** | 8.60 |
|  | 0.043 |  | 0.067 |  | 0.046 |  |
| Marriage |  |  | 0.090 | 0.66 |  |  |
|  |  |  | 0.136 |  |  |  |
| Packaging | -0.007 | -0.07 | -0.180 | -1.26 | -0.261*** | -2.69 |
|  | 0.093 |  | 0.143 |  | 0.097 |  |
| Brand | -0.218* | -1.84 | -0.183 | -0.99 | -0.419*** | -3.54 |
|  | 0.118 |  | 0.185 |  | 0.118 |  |
| Price | -0.512*** | -3.97 | -0.639*** | 3.20 | -1.248*** | -7.87 |
|  | 0.129 |  | 0.200 |  | 0.159 |  |
| Date | -0.417*** | -2.94 | -0.288 | -1.34 | -0.711*** | -4.94 |
|  | 0.142 |  | 0.215 |  | 0.144 |  |
| Flavor | -0.393*** | -3.35 | -0.268 | -1.47 | -0.642*** | -5.40 |
|  | 0.117 |  | 0.182 |  | 0.119 |  |
| Supermarket | 0.032 | 0.52 | 0.217** | 2.33 | 0.323*** | 4.52 |
|  | 0.062 |  | 0.093 |  | 0.072 |  |
| Online | -0.093 | -0.59 | 0.068 | 0.29 | 0.038 | 0.25 |
|  | 0.158 |  | 0.237 |  | 0.155 |  |
| Safety Cognition | 0.057 | 1.45 | 0.028 | 0.47 | 0.093** | 2.41 |
|  | 0.039 |  | 0.059 |  | 0.038 |  |
| Environment Cognition | 0.059* | 1.76 | 0.018 | 0.35 | 0.076** | 2.30 |
|  | 0.034 |  | 0.050 |  | 0.033 |  |
| Policy Cognition | 0.019 | 0.65 | 0.086* | 1.93 | 0.108*** | 3.55 |
|  | 0.029 |  | 0.044 |  | 0.031 |  |
| Psychology Cognition | 0.086*** | 3.00 | 0.048 | 1.11 | 0.139*** | 4.84 |
|  | 0.029 |  | 0.043 |  | 0.029 |  |
| Safety Motivation | 0.241*** | 4.85 | 0.369*** | 4.87 | 0.650*** | 8.99 |
|  | 0.050 |  | 0.076 |  | 0.072 |  |
| Policy Motivation | 0.058 | 1.15 | 0.153** | 2.01 | 0.237*** | 4.32 |
|  | 0.051 |  | 0.076 |  | 0.055 |  |
| Environment Motivation | 0.039 | 0.79 | 0.173** | 2.39 | 0.281*** | 4.88 |
|  | 0.049 |  | 0.072 |  | 0.058 |  |
| Psychology Motivation | 0.083** | 2.12 | 0.188*** | 3.14 | 0.283*** | 6.10 |
|  | 0.039 |  | 0.060 |  | 0.046 |  |
| IMR_3 |  |  |  |  | 1.890*** | 7.62 |
| Cons | 0.598** | 2.51 | -1.398*** | 3.70 | -2.495*** | -5.33 |
|  | 0.239 |  | 0.378 |  | 0.468 |  |
| *N* | 1158 |  | 1158 |  | 1158 |  |
| *R*2 | 0.311 |  |  |  | 0.345 |  |

Note: *** implies the significant result is on the level of 1%, ** implies the significant result is on the level of 5%, and * implies the significant result is on the level of 10%.

**Table 4**

Descriptive statistics of consumption habits.

| Variables | Frequency | | Ratio % | |
| --- | --- | --- | --- | --- |
| Yes | No | Yes | No |
| Brand | 359 | 799 | 31.00 | 69.00 |
| Date | 101 | 1057 | 8.72 | 91.28 |
| Place | 78 | 1080 | 6.74 | 93.26 |
| Flavor | 437 | 721 | 37.74 | 62.26 |
| Supermarket | 758 | 400 | 65.46 | 34.54 |
| Online | 40 | 1118 | 3.45 | 96.55 |

**Table 5**

Descriptive statistics of cognition and motivation.

| Variables | Rating | | | | | Mean | S.D |
| --- | --- | --- | --- | --- | --- | --- | --- |
| 1 | 2 | 3 | 4 | 5 |
| Safety Cognition | 106 | 430 | 521 | 82 | 19 | 2.55 | 0.819 |
| Environment Cognition | 197 | 376 | 472 | 86 | 27 | 2.46 | 0.937 |
| Policy Cognition | 89 | 189 | 517 | 268 | 95 | 3.08 | 1.012 |
| Psychology Cognition | 144 | 219 | 479 | 257 | 59 | 2.89 | 1.049 |
| Safety Motivation | 23 | 31 | 514 | 423 | 167 | 3.59 | 0.839 |
| Policy Motivation | 16 | 44 | 452 | 467 | 179 | 3.65 | 0.835 |
| Environment Motivation | 11 | 30 | 321 | 502 | 294 | 3.9 | 0.843 |
| Psychology Motivation | 26 | 63 | 523 | 423 | 123 | 3.48 | 0.84 |

**Table 6**

Distribution of WTP and premium.

| Variables | Description | Frequency | Ratio % |
| --- | --- | --- | --- |
| WTP | Unwillingness | 580 | 50.09 |
| Willingness | 578 | 49.91 |
| Premium | 0% | 580 | 50.09 |
| 1%-50% | 418 | 36.10 |
| 51%-100% | 98 | 8.46 |
| 101%-150% | 26 | 2.25 |
| 151%-200% | 14 | 1.21 |
| 201%-250% | 7 | 0.60 |
| 251%-300% | 6 | 0.52 |
| >=300% | 9 | 0.78 |
| Total | 1158 | | 100 |

**Table 7**

Robustness test results of model 4

| Variables | Model 4 | | | | | |
| --- | --- | --- | --- | --- | --- | --- |
| OLS | | WTP | | Premium | |
| Coefficient  Std. Err. | t value | Coefficient  Std. Err. | z value | Coefficient  Std. Err. | t value |
| Familiarity | 0.126*** | 3.01 | 0.170*** | 2.59 | 0.283*** | 5.81 |
|  | 0.042 |  | 0.066 |  | 0.049 |  |
| Gender | 0.164*** | 2.85 | 0.179** | 1.98 | 0.341*** | 5.36 |
|  | 0.058 |  | 0.090 |  | 0.064 |  |
| Education | 0.029 | 1.16 | 0.134*** | 3.36 | 0.152*** | 4.18 |
|  | 0.025 |  | 0.040 |  | 0.032 |  |
| Age | 0.028 | 0.77 | 0.023 | 0.29 | 0.095** | 2.52 |
|  | 0.037 |  | 0.079 |  | 0.038 |  |
| Children | 0.058 | 0.97 | 0.131 | 1.38 | 0.213*** | 3.33 |
|  | 0.060 |  | 0.095 |  | 0.064 |  |
| Elder | 0.121** | 2.04 | 0.155* | 1.68 | 0.276*** | 4.36 |
|  | 0.059 |  | 0.092 |  | 0.063 |  |
| Income | 0.146*** | 6.80 | 0.103*** | 2.99 | 0.243*** | 9.20 |
|  | 0.021 |  | 0.035 |  | 0.026 |  |
| Household size | -0.038 | -1.41 | -0.052 | -1.25 | -0.096*** | -3.44 |
|  | 0.027 |  | 0.042 |  | 0.028 |  |
| Frequency | 0.236*** | 5.59 | 0.176*** | 2.61 | 0.378*** | 7.94 |
|  | 0.042 |  | 0.067 |  | 0.048 |  |
| Packaging | -0.012 | -0.13 | -0.192 | -1.33 | -0.235** | -2.44 |
|  | 0.091 |  | 0.145 |  | 0.096 |  |
| Price | -0.442*** | -3.51 | -0.612*** | -3.02 | -1.046*** | -6.60 |
|  | 0.126 |  | 0.203 |  | 0.159 |  |
| Brand | -0.208* | -1.79 | -0.182 | -0.97 | -0.377*** | -3.21 |
|  | 0.116 |  | 0.188 |  | 0.118 |  |
| Date | -0.342** | -2.46 | -0.254 | -1.16 | -0.565*** | -3.99 |
|  | 0.139 |  | 0.219 |  | 0.141 |  |
| Flavor | -0.325*** | -2.82 | -0.226 | -1.22 | -0.508*** | -4.34 |
|  | 0.115 |  | 0.186 |  | 0.117 |  |
| Supermarket | 0.063 | 1.04 | 0.213** | 2.27 | 0.302*** | 4.26 |
|  | 0.060 |  | 0.094 |  | 0.071 |  |
| Online | -0.048 | -0.32 | 0.073 | 0.31 | 0.061 | 0.40 |
|  | 0.153 |  | 0.238 |  | 0.152 |  |
| Safety Cognition | 0.046 | 1.22 | 0.023 | 0.39 | 0.070* | 1.86 |
|  | 0.038 |  | 0.060 |  | 0.038 |  |
| Environment Cognition | 0.046 | 1.42. | 0.016 | 0.31 | 0.053 | 1.64 |
|  | 0.033 |  | 0.051 |  | 0.032 |  |
| Policy Cognition | 0.025 | 0.90 | 0.084* | 1.87 | 0.097*** | 3.23 |
|  | 0.028 |  | 0.045 |  | 0.030 |  |
| Psychology Cognition | 0.073** | 2.58 | 0.048 | 1.10 | 0.119*** | 4.12 |
|  | 0.028 |  | 0.044 |  | 0.029 |  |
| Safety Motivation | 0.233*** | 4.83 | 0.360*** | 4.70 | 0.577*** | 7.84 |
|  | 0.048 |  | 0.077 |  | 0.074 |  |
| Policy Motivation | 0.070 | 1.43 | 0.163** | 2.11 | 0.230*** | 4.17 |
|  | 0.049 |  | 0.077 |  | 0.055 |  |
| Environment Motivation | 0.066 | 1.38 | 0.183** | 2.50 | 0.271*** | 4.69 |
|  | 0.048 |  | 0.073 |  | 0.058 |  |
| Psychology Motivation | 0.083** | 2.18 | 0.188*** | 3.11 | 0.255*** | 5.43 |
|  | 0.038 |  | 0.061 |  | 0.047 |  |
| Marriage |  |  | 0.121 | 0.85 |  |  |
|  |  |  | 0.142 |  |  |  |
| Cognition*Motivation | 0.215*** | 3.44 | 0.124 | 1.02 | 0.208*** | 3.38 |
|  | 0.063 |  | 0.122 |  | 0.062 |  |
| IMR_5 |  |  |  |  | 1.629*** | 6.11 |
|  |  |  |  |  | 0.267 |  |
| Cons | 0.733*** | 3.07 | -1.414*** | -3.61 | -2.033*** | -3.98 |
|  | 0.239 |  | 0.392 |  | 0.510 |  |
| *N* | 1129 |  | 1129 |  | 1129 |  |
| *R*2 | 0.299 |  |  |  | 0.322 |  |

Note: *** implies the significant result is on the level of 1%, ** implies the significant result is on the level of 5%, and * implies the significant result is on the level of 10%.
